# Supplementary material for: Proteomic Identification of Heat Shock-Induced Danger Signals in a Melanoma Cell Lysate Used in Dendritic Cell-Based Cancer Immunotherapy
Source: Hindawi journal article supplement (doi:10.1155/2018/3982942), 2018-01-01
Supplement: f1 [file 3982942.f1.pdf]

**Supplementary figures**

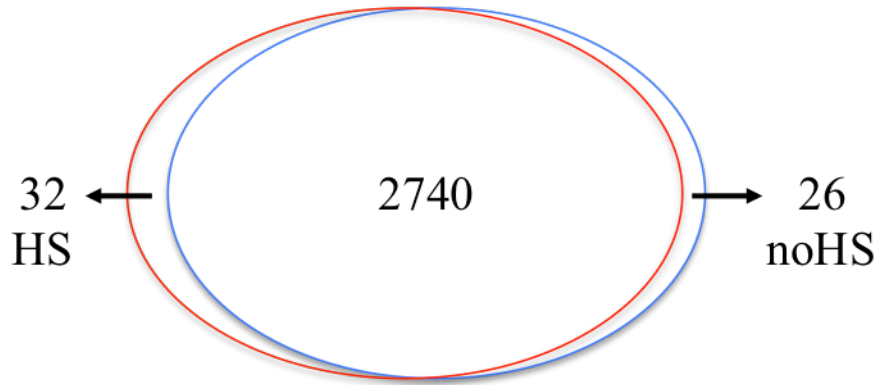

**Supplementary Figure 1.** Venn-diagram illustrating the number of proteins that overlap between HS and no-HS samples and proteins exclusively identified in HS stimulated samples (HS) and unstimulated (noHS) samples.



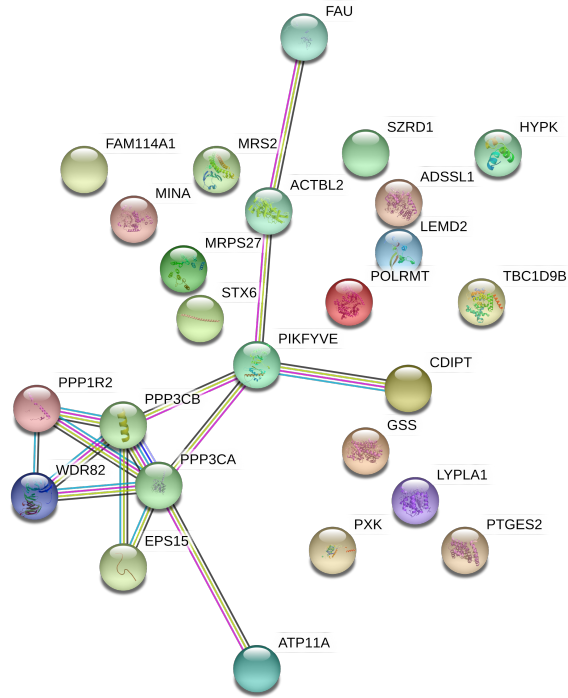

**Supplementary Figure 3.** Protein-protein interaction network of proteins exclusively expressed in no-HS conditioned melanoma-derived lysates samples. STRING analysis did not find the protein PPP1R2P3 (Gene ID: 153743), which is not depicted. Line color indicate the type of interaction evidence. Known interactions: cyan, from curated databases; pink, experimentally determined. Predicted interactions: green, gene neighborhood; red, gene fusions; blue; gene co-occurrence. Others: yellow, textminig; black, co-expression; purple, protein homology. Interaction confidence score, 0.4 (medium).

## Supplementary tables

**Supplementary Table 1. Currently known functions of selected gene-proteins down-regulated by HS. The protein list was filtered by  $p < 0.01$  or  $\text{abs}(\log_2(\text{FC})) > 1$ .**

| Gen     | ID (NCBI) | Full name (NCBI)                                                  | Function (Gene Ontology)                                                                                                                                                                                                                                                                                             | Reference        |
|---------|-----------|-------------------------------------------------------------------|----------------------------------------------------------------------------------------------------------------------------------------------------------------------------------------------------------------------------------------------------------------------------------------------------------------------|------------------|
| ACAT2   | 39        | <i>Acetyl-CoA acetyltransferase 2</i>                             | ·Acetyl-CoA C-acetyltransferase activity<br>·Protein binding                                                                                                                                                                                                                                                         | [1,2]            |
| ACO1    | 48        | <i>Aconitase 1</i>                                                | ·Aconitate hydratase activity<br>·3 iron, 4 sulfur cluster; 4 iron, 4 sulfur cluster; RNA; iron-responsive element and protein binding                                                                                                                                                                               | [3-8]            |
| ACTN1   | 87        | <i>Actinin alpha 1</i>                                            | ·Ligand-dependent nuclear receptor transcription coactivator and protein homodimerization activity<br>·Actin filament; double-stranded RNA; integrin; ion channel; protein and vinculin binding                                                                                                                      | [9-14]           |
| ACTN4   | 81        | <i>Actinin alpha 4</i>                                            | ·Ligand-dependent nuclear receptor transcription coactivator and protein homodimerization activity<br>·RNA; RNA polymerase II regulatory region sequence-specific DNA; actin; actin filament; chromatin DNA; integrin; ion channel; nuclear hormone receptor; nucleoside; protein and retinoic acid receptor binding | [9,12,13,15-19]  |
| ADH5    | 128       | <i>Alcohol dehydrogenase 5 (class III), chi polypeptide</i>       | ·S-(hydroxymethyl)glutathione dehydrogenase; electron transfer and formaldehyde dehydrogenase activity<br>·Fatty acid and zinc ion binding                                                                                                                                                                           | [20,21]          |
| ALDOA   | 226       | <i>Aldolase, fructose-bisphosphate A</i>                          | ·Fructose-bisphosphate aldolase activity<br>·RNA; actin; cadherin; cytoskeletal protein; fructose; identical protein; protein and tubulin binding                                                                                                                                                                    | [22-28]          |
| ARHGDIA | 396       | <i>Rho GDP dissociation inhibitor alpha</i>                       | ·Protein binding                                                                                                                                                                                                                                                                                                     | [29]             |
| BTF3    | 689       | <i>Basic transcription factor 3</i>                               | ·RNA and protein binding                                                                                                                                                                                                                                                                                             | [2,15,23]        |
| CAND1   | 55832     | <i>Cullin associated and neddylation dissociated 1</i>            | ·Protein binding                                                                                                                                                                                                                                                                                                     | [30]             |
| CAP1    | 10487     | <i>Cyclase associated actin cytoskeleton regulatory protein 1</i> |                                                                                                                                                                                                                                                                                                                      |                  |
| CAPZA2  | 830       | <i>Capping actin protein of muscle Z-line alpha subunit 2</i>     |                                                                                                                                                                                                                                                                                                                      |                  |
| CCT3    | 7203      | <i>Chaperonin containing TCP1 subunit 3</i>                       | ·RNA; protein and protein binding involved in protein folding                                                                                                                                                                                                                                                        | [2,23,31]        |
| CCT4    | 10575     | <i>Chaperonin containing TCP1 subunit 4</i>                       | ·RNA and protein binding                                                                                                                                                                                                                                                                                             | [15,32]          |
| CSRP1   | 1465      | <i>Cysteine and glycine rich protein 1</i>                        | ·RNA and zinc ion binding                                                                                                                                                                                                                                                                                            | [15,33]          |
| DPYSL2  | 1808      | <i>Dihydropyrimidinase like 2</i>                                 | ·Dihydropyrimidinase activity<br>·Identical protein and protein binding                                                                                                                                                                                                                                              | [2,34]           |
| DSTN    | 11034     | <i>Destrin, actin depolymerizing factor</i>                       | ·Actin filament and protein binding                                                                                                                                                                                                                                                                                  | [2,35]           |
| EEF2    | 1938      | <i>Eukaryotic translation elongation factor 2</i>                 | ·RNA; cadherin; protein and protein kinase binding                                                                                                                                                                                                                                                                   | [15,23,25,36-38] |
| EIF1    | 10209     | <i>Eukaryotic translation initiation factor 1</i>                 | ·Translation initiation factor activity<br>·RNA and translation factor activity, RNA binding                                                                                                                                                                                                                         | [23,39,40]       |
| EIF3J   | 8669      | <i>Eukaryotic translation initiation factor 3 subunit J</i>       | ·Contributes to translation initiation factor activity<br>·Protein binding                                                                                                                                                                                                                                           | [41,42]          |
| EIF4E   | 1977      | <i>Eukaryotic translation initiation factor 4E</i>                | ·Translation initiation factor activity<br>·RNA 7-methylguanosine cap; RNA; RNA cap; enzyme; eukaryotic initiation factor 4G; protein and repressing transcription factor binding                                                                                                                                    | [23,43-47]       |

(continue on next page)



|                             |                          |                                                                                                                          |                                                                                                                                                                                                                                                                    |                             |
|-----------------------------|--------------------------|--------------------------------------------------------------------------------------------------------------------------|--------------------------------------------------------------------------------------------------------------------------------------------------------------------------------------------------------------------------------------------------------------------|-----------------------------|
| ETF1                        | 2107                     | <i>Eukaryotic translation termination factor 1</i>                                                                       | ·Translation release factor and translation termination factor activity<br>·RNA; protein; ribosome and sequence-specific mRNA binding                                                                                                                              | [2,15,48-51]                |
| FAM49B                      | 51571                    | <i>Family with sequence similarity 49 member B</i>                                                                       | ·Protein binding                                                                                                                                                                                                                                                   | [2]                         |
| FKBP1A                      | 2280                     | <i>FK506 binding protein 1A</i>                                                                                          | ·NOT calcium channel inhibitor; peptidyl-prolyl cis-trans isomerase and signal transducer activity<br>·FK506; SMAD; activin; ion channel; macrolide; protein; transforming growth factor beta receptor and type I transforming growth factor beta receptor binding | [2,52-59]                   |
| GDI1                        | 2664                     | <i>GDP dissociation inhibitor 1</i>                                                                                      | ·GDP-dissociation inhibitor activity<br>·Protein binding                                                                                                                                                                                                           | [30,60,61]                  |
| GDI2                        | 2665                     | <i>GDP dissociation inhibitor 2</i>                                                                                      | ·RNA and protein binding                                                                                                                                                                                                                                           | [23,62]                     |
| GOT1                        | 2805                     | <i>Glutamic-oxaloacetic transaminase 1</i>                                                                               | ·L-aspartate:2-oxoglutarate aminotransferase activity                                                                                                                                                                                                              | [63,64]                     |
| GYG1                        | 2992                     | <i>Glycogenin 1</i>                                                                                                      | ·Glycogenin glucosyltransferase activity<br>·Protein binding                                                                                                                                                                                                       | [2,65]                      |
| HPRT1                       | 3251                     | <i>Hypoxanthine phosphoribosyltransferase 1</i>                                                                          | ·Guanine phosphoribosyltransferase; hypoxanthine phosphoribosyltransferase and protein homodimerization activity<br>·Identical protein; magnesium ion and protein binding                                                                                          | [2,61,66-68]                |
| HSPA4                       | 3308                     | <i>Heat shock protein family A (Hsp70) member 4</i>                                                                      | ·ATP and protein binding                                                                                                                                                                                                                                           | [2,69]                      |
| LTA4H                       | 4048                     | <i>Leukotriene A4 hydrolase</i>                                                                                          | ·Aminopeptidase; epoxide hydrolase; leukotriene-A4 hydrolase; metalloaminopeptidase and peptidase activity<br>·RNA; protein and zinc ion binding                                                                                                                   | [15,70-74]                  |
| MDH1                        | 4190                     | <i>Malate dehydrogenase 1</i>                                                                                            | ·Malic enzyme activity<br>·Protein binding                                                                                                                                                                                                                         | [74,75]                     |
| MSN                         | 4478                     | <i>Moesin</i>                                                                                                            | ·Cell adhesion molecule; double-stranded RNA; enzyme; protein; protein kinase and receptor binding<br>·Structural constituent of cytoskeleton                                                                                                                      | [11,76-82]                  |
| MTAP                        | 4507                     | <i>Methylthioadenosine phosphorylase</i>                                                                                 | ·Phosphorylase activity<br>·Protein binding                                                                                                                                                                                                                        | [2,83]                      |
| MTPN                        | 136319                   | <i>Myotrophin</i>                                                                                                        |                                                                                                                                                                                                                                                                    |                             |
| NACA                        | 4666                     | <i>Nascent polypeptide-associated complex alpha subunit</i>                                                              |                                                                                                                                                                                                                                                                    |                             |
| NME1/<br>NME1-NME2/<br>NME2 | 4830/<br>654364/<br>4831 | <i>NME/NM23 nucleoside diphosphate kinase 1/<br/>NME1-NME2 readthrough/<br/>NME/NM23 nucleoside diphosphate kinase 2</i> | ·Deoxyribonuclease and nucleoside diphosphate kinase activity/-DNA binding transcription factor and nucleoside diphosphate kinase activity<br>·ATP; GTP; RNA; identical protein; magnesium ion; protein and ribosomal small subunit binding/-Protein binding       | [2,15,61,84-86]/-[85,87,88] |
| NPEPPS                      | 9520                     | <i>Aminopeptidase puromycin sensitive</i>                                                                                | ·Aminopeptidase activity                                                                                                                                                                                                                                           | [89]                        |
| NUTF2                       | 10204                    | <i>Nuclear transport factor 2</i>                                                                                        | ·Nucleocytoplasmic transporter activity<br>·Ran GTPase; identical protein and protein binding                                                                                                                                                                      | [2,90-92]                   |
| PAFAH1B2                    | 5049                     | <i>Platelet activating factor acetylhydrolase 1b catalytic subunit 2</i>                                                 | ·Protein binding                                                                                                                                                                                                                                                   | [93]                        |
| PDCD5                       | 9141                     | <i>Programmed cell death 5</i>                                                                                           | ·Acetyltransferase activator activity<br>·Beta-tubulin; heparin and protein binding                                                                                                                                                                                | [94-96]                     |
| PEBP1                       | 5037                     | <i>Phosphatidylethanolamine binding protein 1</i>                                                                        | ·RNA; enzyme; phosphatidylethanolamine; protein and protein kinase binding                                                                                                                                                                                         | [15,95,97]                  |
| PFDN2                       | 5202                     | <i>Prefoldin subunit 2</i>                                                                                               | ·Protein; protein binding involved in protein folding and unfolded protein binding                                                                                                                                                                                 | [98-100]                    |
| PGD                         | 5226                     | <i>Phosphogluconate dehydrogenase</i>                                                                                    | ·Phosphogluconate dehydrogenase (decarboxylating) activity                                                                                                                                                                                                         | [101]                       |

(continue on next page)

|                            |                            |                                                                                                                                                    |                                                                                                                                                                                                            |                 |
|----------------------------|----------------------------|----------------------------------------------------------------------------------------------------------------------------------------------------|------------------------------------------------------------------------------------------------------------------------------------------------------------------------------------------------------------|-----------------|
| PGM1                       | 5236                       | <i>Phosphoglucomutase 1</i>                                                                                                                        | ·Phosphoglucomutase activity<br>·Magnesium ion and protein binding                                                                                                                                         | [74,102,103]    |
| PGK1                       | 5230                       | <i>Phosphoglycerate kinase 1</i>                                                                                                                   | ·Phosphoglycerate kinase and protein-disulfide reductase activity<br>·Protein binding                                                                                                                      | [104-106]       |
| PGPEP1                     | 54858                      | <i>Pyroglutamyl-peptidase I</i>                                                                                                                    |                                                                                                                                                                                                            |                 |
| PITPNA                     | 5306                       | <i>Phosphatidylinositol transfer protein alpha</i>                                                                                                 | ·Phosphatidylcholine transporter and phosphatidylinositol transporter activity<br>·Phosphatidylcholine; phosphatidylglycerol and phosphatidylinositol binding                                              | [107]           |
| PKM                        | 5315                       | <i>Pyruvate kinase M1/2</i>                                                                                                                        | ·Pyruvate kinase activity<br>·MHC class II protein complex; RNA; cadherin and protein binding                                                                                                              | [15,25,108-110] |
| PLS3                       | 5358                       | <i>Plastin 3</i>                                                                                                                                   |                                                                                                                                                                                                            |                 |
| PRDX2                      | 7001                       | <i>Peroxiredoxin 2</i>                                                                                                                             | ·Antioxidant and thioredoxin peroxidase activity<br>·Protein binding                                                                                                                                       | [111-113]       |
| PSMA6                      | 5687                       | <i>Proteasome subunit alpha 6</i>                                                                                                                  | ·Endopeptidase activity<br>·NF-kappaB; RNA; protein and purine ribonucleoside triphosphate binding                                                                                                         | [2,114,115]     |
| PSME1                      | 5720                       | <i>Proteasome activator subunit 1</i>                                                                                                              | ·Protein binding                                                                                                                                                                                           | [93]            |
| RPS19                      | 6223                       | <i>Ribosomal protein S19</i>                                                                                                                       | ·Protein homodimerization activity<br>·RNA; fibroblast growth factor; protein and protein kinase binding<br>·Structural constituent of ribosome                                                            | [23,116-120]    |
| RPS21                      | 6227                       | <i>Ribosomal protein S21</i>                                                                                                                       | ·RNA and protein N-terminus binding                                                                                                                                                                        | [15,121]        |
| SARS                       | 6301                       | <i>Seryl-tRNA synthetase</i>                                                                                                                       | ·Protein homodimerization and serine-tRNA ligase activity<br>·RNA; core promoter sequence-specific DNA and protein binding                                                                                 | [122-125]       |
| SEPT2                      | 4735                       | <i>Septin 2</i>                                                                                                                                    | ·Cadherin and protein binding                                                                                                                                                                              | [25,126]        |
| ST13/<br>ST13P4/<br>ST13P5 | 6767/<br>145165/<br>144106 | <i>ST13, Hsp70 interacting protein/<br/>ST13, Hsp70 interacting protein<br/>pseudogene 4/<br/>ST13, Hsp70 interacting protein<br/>pseudogene 5</i> | ·Protein binding<br>·Protein binding, bridging                                                                                                                                                             | [127,128]       |
| STIP1                      | 10963                      | <i>Stress induced phosphoprotein 1</i>                                                                                                             | ·RNA and protein binding                                                                                                                                                                                   | [15,129]        |
| STMN1                      | 3925                       | <i>Stathmin 1</i>                                                                                                                                  | ·Signal transducer activity<br>·Protein and tubulin binding                                                                                                                                                | [2,130,131]     |
| TFG                        | 10342                      | <i>TRK-fused gene</i>                                                                                                                              | ·Signal transducer activity<br>·Identical protein and protein binding                                                                                                                                      | [54,132,133]    |
| TMSB4X/<br>TMSB4XP4        | 7114/<br>7118              | <i>Thymosin beta 4, X-linked/<br/>Thymosin beta 4, X-linked<br/>pseudogene 4</i>                                                                   | ·RNA; actin monomer; enzyme and protein binding                                                                                                                                                            | [15,134-136]    |
| TPP2                       | 7174                       | <i>Tripeptidyl peptidase 2</i>                                                                                                                     | ·Aminopeptidase and endopeptidase activity<br>·Identical protein and protein binding                                                                                                                       | [61,89,137,138] |
| TROVE2                     | 6738                       | <i>TROVE domain family member 2</i>                                                                                                                | ·RNA binding                                                                                                                                                                                               | [139]           |
| UBE2L3                     | 7332                       | <i>Ubiquitin conjugating enzyme E2 L3</i>                                                                                                          | ·Transcription coactivator; ubiquitin conjugating enzyme; ubiquitin-protein transferase activator and ubiquitin-protein transferase activity<br>·RNA; enzyme; protein and ubiquitin protein ligase binding | [15,140-145]    |
| UGP2                       | 7360                       | <i>UDP-glucose pyrophosphorylase 2</i>                                                                                                             | ·UTP:glucose-1-phosphate uridylyltransferase activity<br>·Identical protein and protein binding                                                                                                            | [2,146]         |

(continue on next page)

|      |      |                                   |                                                                                                                                                                                                                                                                                              |                |
|------|------|-----------------------------------|----------------------------------------------------------------------------------------------------------------------------------------------------------------------------------------------------------------------------------------------------------------------------------------------|----------------|
| VCL  | 7414 | <i>Vinculin</i>                   | ·Actin; NOT actin; alpha-catenin; beta-catenin; cadherin; dystroglycan; protein and ubiquitin protein ligase binding                                                                                                                                                                         | [2,25,147-152] |
| VCP  | 7415 | <i>Valosin containing protein</i> | ·ATPase and deubiquitinase activator activity<br>·BAT3 complex; RNA; identical protein; polyubiquitin modification-dependent protein; protein; protein domain specific; protein phosphatase; ubiquitin protein ligase; ubiquitin-like protein ligase and ubiquitin-specific protease binding | [23,153-164]   |
| YARS | 8565 | <i>Tyrosyl-tRNA synthetase</i>    | ·Signal transducer activity<br>·RNA; interleukin-8 receptor and protein binding                                                                                                                                                                                                              | [15,165,166]   |

Abbreviations: ID, Identification number; NCBI, National Center for Biotechnology Information.

**Supplementary Table 2. Currently known functions of gene-proteins exclusive expressed by non-HS samples.**

| Gen                 | ID (NCBI)       | Full name (NCBI)                                                                                                                   | Function (Gene Ontology)                                                                                                                                                                                                                                                                                                                                                                              | Reference                         |
|---------------------|-----------------|------------------------------------------------------------------------------------------------------------------------------------|-------------------------------------------------------------------------------------------------------------------------------------------------------------------------------------------------------------------------------------------------------------------------------------------------------------------------------------------------------------------------------------------------------|-----------------------------------|
| ACTBL2              | 345651          | <i>Actin, beta like 2</i>                                                                                                          | ·Protein binding                                                                                                                                                                                                                                                                                                                                                                                      | [29]                              |
| ADSSL1              | 122622          | <i>Adenylosuccinate synthase like 1</i>                                                                                            | ·Adenylosuccinate synthase activity<br>·GTP and phosphate ion binding                                                                                                                                                                                                                                                                                                                                 | [167,168]                         |
| ATP11A              | 23250           | <i>ATPase phospholipid transporting 11A</i>                                                                                        | ·Protein binding                                                                                                                                                                                                                                                                                                                                                                                      | [169]                             |
| CDIPT               | 10423           | <i>CDP-diacylglycerol--inositol 3-phosphatidyltransferase</i>                                                                      | ·CDP-diacylglycerol-inositol 3-phosphatidyltransferase activity<br>·Protein binding                                                                                                                                                                                                                                                                                                                   | [2,170]                           |
| EPS15               | 2060            | <i>Epidermal growth factor receptor pathway substrate 15</i>                                                                       | ·Cadherin; polyubiquitin and protein binding                                                                                                                                                                                                                                                                                                                                                          | [25,171,172]                      |
| FAM114A1            | 92689           | <i>Family with sequence similarity 114 member A1</i>                                                                               | ·Protein binding                                                                                                                                                                                                                                                                                                                                                                                      | [2]                               |
| FAU                 | 2197            | <i>FAU, ubiquitin like and ribosomal protein S30 fusion</i>                                                                        | ·RNA binding                                                                                                                                                                                                                                                                                                                                                                                          | [23]                              |
| GSS                 | 2937            | <i>Glutathione synthetase</i>                                                                                                      | ·Protein homodimerization activity<br>·ATP; glutathione; identical protein; magnesium ion and protein binding                                                                                                                                                                                                                                                                                         | [2,74,173]                        |
| HYPK                | 25764           | <i>Huntingtin interacting protein K</i>                                                                                            | ·Protein N-terminus and protein binding                                                                                                                                                                                                                                                                                                                                                               | [2,174]                           |
| LEMD2               | 221496          | <i>LEM domain containing 2</i>                                                                                                     | ·Protein binding                                                                                                                                                                                                                                                                                                                                                                                      | [175]                             |
| LYPLA1              | 10434           | <i>Lysophospholipase I</i>                                                                                                         | ·Lipase; lysophospholipase and palmitoyl-(protein) hydrolase activity                                                                                                                                                                                                                                                                                                                                 | [176-178]                         |
| MINA                | 84864           | <i>Ribosomal oxygenase 2</i>                                                                                                       | ·Identical protein binding                                                                                                                                                                                                                                                                                                                                                                            | [2]                               |
| MRPS27              | 23107           | <i>Mitochondrial ribosomal protein S27</i>                                                                                         | ·Protein binding                                                                                                                                                                                                                                                                                                                                                                                      | [179]                             |
| MRS2                | 57380           | <i>MRS2, magnesium transporter</i>                                                                                                 | ·Magnesium ion transmembrane transporter activity                                                                                                                                                                                                                                                                                                                                                     | [180]                             |
| PIKFYVE             | 200576          | <i>Phosphoinositide kinase, FYVE-type zinc finger containing</i>                                                                   | ·1-phosphatidylinositol-4-phosphate 5-kinase activity<br>·Protein binding                                                                                                                                                                                                                                                                                                                             | [2,181]                           |
| POLRMT              | 5442            | <i>RNA polymerase mitochondrial</i>                                                                                                | ·DNA-directed 5'-3' RNA polymerase activity<br>·RNA and protein binding                                                                                                                                                                                                                                                                                                                               | [15,23,182]                       |
| PPP1R2/<br>PPP1R2P3 | 5504/<br>153743 | <i>Protein phosphatase 1 regulatory inhibitor subunit 2/<br/>Protein phosphatase 1 regulatory inhibitor subunit 2 pseudogene 3</i> | ·Protein serine/threonine phosphatase inhibitor activity<br>·Protein binding/Protein binding                                                                                                                                                                                                                                                                                                          | [29,183]/<br>[2]                  |
| PPP3CA/<br>PPP3CB   | 5530/<br>5532   | <i>Protein phosphatase 3 catalytic subunit alpha/<br/>Protein phosphatase 3 catalytic subunit beta</i>                             | ·Calmodulin-dependent protein phosphatase; protein dimerization and protein serine/threonine phosphatase activity/Calmodulin-dependent protein phosphatase; protein dimerization and protein serine/threonine phosphatase activity<br>·Calcium ion; calmodulin; cyclosporin A; drug; enzyme and protein binding/<br>Calcium ion; calmodulin; drug; enzyme; protein and protein phosphatase 2B binding | [2,184-188]/<br>[185,186,189-191] |
| PTGES2              | 80142           | <i>Prostaglandin E synthase 2</i>                                                                                                  | ·Protein binding                                                                                                                                                                                                                                                                                                                                                                                      | [2]                               |
| PXK                 | 54899           | <i>PX domain containing serine/threonine kinase like</i>                                                                           | ·NOT protein kinase activity<br>·NOT ATP and NOT nucleotide binding                                                                                                                                                                                                                                                                                                                                   | [192]                             |
| STX6                | 10228           | <i>Syntaxin 6</i>                                                                                                                  | ·Protein and syntaxin binding                                                                                                                                                                                                                                                                                                                                                                         | [2,193]                           |

(continue on next page)

|         |       |                                     |                                                                     |  |  |           |
|---------|-------|-------------------------------------|---------------------------------------------------------------------|--|--|-----------|
| SZRD1   | 26099 | SUZ RNA binding domain containing 1 |                                                                     |  |  |           |
| TBC1D9B | 23061 | TBC1 domain family member 9B        | ·Protein binding                                                    |  |  | [194]     |
| WDR82   | 80335 | WD repeat domain 82                 | ·Contributes to histone (H3-K4 methyltransferase activity specific) |  |  | [195,196] |
|         |       |                                     | ·Protein binding                                                    |  |  |           |

Abbreviations: ID, Identification number; NCBI, National Center for Biotechnology Information.

## Supplementary references

1. Song XQ, Fukao T, Yamaguchi S, Miyazawa S, Hashimoto T, et al. (1994) Molecular cloning and nucleotide sequence of complementary DNA for human hepatic cytosolic acetoacetyl-coenzyme A thiolase. *Biochem Biophys Res Commun* 201: 478-485.
2. Rolland T, Tasan M, Charlotiaux B, Pevzner SJ, Zhong Q, et al. (2014) A proteome-scale map of the human interactome network. *Cell* 159: 1212-1226.
3. Philpott CC, Klausner RD, Rouault TA (1994) The bifunctional iron-responsive element binding protein/cytosolic aconitase: the role of active-site residues in ligand binding and regulation. *Proc Natl Acad Sci U S A* 91: 7321-7325.
4. Haile DJ, Rouault TA, Harford JB, Kennedy MC, Blondin GA, et al. (1992) Cellular regulation of the iron-responsive element binding protein: disassembly of the cubane iron-sulfur cluster results in high-affinity RNA binding. *Proc Natl Acad Sci U S A* 89: 11735-11739.
5. Dupuy J, Volbeda A, Carpentier P, Darnault C, Moulis JM, et al. (2006) Crystal structure of human iron regulatory protein 1 as cytosolic aconitase. *Structure* 14: 129-139.
6. Kaptain S, Downey WE, Tang C, Philpott C, Haile D, et al. (1991) A regulated RNA binding protein also possesses aconitase activity. *Proc Natl Acad Sci U S A* 88: 10109-10113.
7. Hentze MW, Argos P (1991) Homology between IRE-BP, a regulatory RNA-binding protein, aconitase, and isopropylmalate isomerase. *Nucleic Acids Res* 19: 1739-1740.
8. Blandin G, Marchand S, Charton K, Daniele N, Gicquel E, et al. (2013) A human skeletal muscle interactome centered on proteins involved in muscular dystrophies: LGMD interactome. *Skelet Muscle* 3: 3.
9. Khurana S, Chakraborty S, Lam M, Liu Y, Su YT, et al. (2012) Familial focal segmental glomerulosclerosis (FSGS)-linked alpha-actinin 4 (ACTN4) protein mutants lose ability to activate transcription by nuclear hormone receptors. *J Biol Chem* 287: 12027-12035.
10. Edlund M, Lotano MA, Otey CA (2001) Dynamics of alpha-actinin in focal adhesions and stress fibers visualized with alpha-actinin-green fluorescent protein. *Cell Motil Cytoskeleton* 48: 190-200.
11. Watanabe A, Tatematsu M, Saeki K, Shibata S, Shime H, et al. (2011) Raftlin is involved in the nucleocapture complex to induce poly(I:C)-mediated TLR3 activation. *J Biol Chem* 286: 10702-10711.
12. Ziane R, Huang H, Moghadaszadeh B, Beggs AH, Levesque G, et al. (2010) Cell membrane expression of cardiac sodium channel Na(v)1.5 is modulated by alpha-actinin-2 interaction. *Biochemistry* 49: 166-178.
13. Yang X, Coulombe-Huntington J, Kang S, Sheynkman GM, Hao T, et al. (2016) Widespread Expansion of Protein Interaction Capabilities by Alternative Splicing. *Cell* 164: 805-817.
14. Bois PR, Borgon RA, Vornrhein C, Izard T (2005) Structural dynamics of alpha-actinin-vinculin interactions. *Mol Cell Biol* 25: 6112-6122.

15. Castello A, Fischer B, Eichelbaum K, Horos R, Beckmann BM, et al. (2012) Insights into RNA biology from an atlas of mammalian mRNA-binding proteins. *Cell* 149: 1393-1406.
16. Zhao X, Hsu KS, Lim JH, Bruggeman LA, Kao HY (2015) alpha-Actinin 4 potentiates nuclear factor kappa-light-chain-enhancer of activated B-cell (NF-kappaB) activity in podocytes independent of its cytoplasmic actin binding function. *J Biol Chem* 290: 338-349.
17. Pavalko FM, LaRoche SM (1993) Activation of human neutrophils induces an interaction between the integrin beta 2-subunit (CD18) and the actin binding protein alpha-actinin. *J Immunol* 151: 3795-3807.
18. Ehrlicher AJ, Krishnan R, Guo M, Bidan CM, Weitz DA, et al. (2015) Alpha-actinin binding kinetics modulate cellular dynamics and force generation. *Proc Natl Acad Sci U S A* 112: 6619-6624.
19. Goto H, Wakui H, Komatsuda A, Ohtani H, Imai H, et al. (2003) Renal alpha-actinin-4: purification and puromycin aminonucleoside-binding property. *Nephron Exp Nephrol* 93: e27-35.
20. Engeland K, Hoog JO, Holmquist B, Estonius M, Jornvall H, et al. (1993) Mutation of Arg-115 of human class III alcohol dehydrogenase: a binding site required for formaldehyde dehydrogenase activity and fatty acid activation. *Proc Natl Acad Sci U S A* 90: 2491-2494.
21. Wagner FW, Pares X, Holmquist B, Vallee BL (1984) Physical and enzymatic properties of a class III isozyme of human liver alcohol dehydrogenase: chi-ADH. *Biochemistry* 23: 2193-2199.
22. Esposito G, Vitagliano L, Costanzo P, Borrelli L, Barone R, et al. (2004) Human aldolase A natural mutants: relationship between flexibility of the C-terminal region and enzyme function. *Biochem J* 380: 51-56.
23. Baltz AG, Munschauer M, Schwanhauser B, Vasile A, Murakawa Y, et al. (2012) The mRNA-bound proteome and its global occupancy profile on protein-coding transcripts. *Mol Cell* 46: 674-690.
24. Clarke FM, Morton DJ (1976) Aldolase binding to actin-containing filaments. Formation of paracrystals. *Biochem J* 159: 797-798.
25. Guo Z, Neilson LJ, Zhong H, Murray PS, Zanivan S, et al. (2014) E-cadherin interactome complexity and robustness resolved by quantitative proteomics. *Sci Signal* 7: rs7.
26. Kusakabe T, Motoki K, Hori K (1997) Mode of interactions of human aldolase isozymes with cytoskeletons. *Arch Biochem Biophys* 344: 184-193.
27. Petit FM, Serres C, Bourgeon F, Pineau C, Auer J (2013) Identification of sperm head proteins involved in zona pellucida binding. *Hum Reprod* 28: 852-865.
28. St-Jean M, Izard T, Sygusch J (2007) A hydrophobic pocket in the active site of glycolytic aldolase mediates interactions with Wiskott-Aldrich syndrome protein. *J Biol Chem* 282: 14309-14315.
29. Boldt K, van Reeuwijk J, Lu Q, Koutroumpas K, Nguyen TM, et al. (2016) An organelle-specific protein landscape identifies novel diseases and molecular mechanisms. *Nat Commun* 7: 11491.

30. Hein MY, Hubner NC, Poser I, Cox J, Nagaraj N, et al. (2015) A human interactome in three quantitative dimensions organized by stoichiometries and abundances. *Cell* 163: 712-723.
31. Freund A, Zhong FL, Venteicher AS, Meng Z, Veenstra TD, et al. (2014) Proteostatic control of telomerase function through TRiC-mediated folding of TCAB1. *Cell* 159: 1389-1403.
32. Bakthavatsalam D, Soung RH, Tweardy DJ, Chiu W, Dixon RA, et al. (2014) Chaperonin-containing TCP-1 complex directly binds to the cytoplasmic domain of the LOX-1 receptor. *FEBS Lett* 588: 2133-2140.
33. Wang X, Lee G, Liebhaber SA, Cooke NE (1992) Human cysteine-rich protein. A member of the LIM/double-finger family displaying coordinate serum induction with c-myc. *J Biol Chem* 267: 9176-9184.
34. Hamajima N, Matsuda K, Sakata S, Tamaki N, Sasaki M, et al. (1996) A novel gene family defined by human dihydropyrimidinase and three related proteins with differential tissue distribution. *Gene* 180: 157-163.
35. Yeoh S, Pope B, Mannherz HG, Weeds A (2002) Determining the differences in actin binding by human ADF and cofilin. *J Mol Biol* 315: 911-925.
36. Sagnol S, Yang Y, Bessin Y, Allemand F, Hapkova I, et al. (2014) Homodimerization of RBPMS2 through a new RRM-interaction motif is necessary to control smooth muscle plasticity. *Nucleic Acids Res* 42: 10173-10184.
37. Davydova E, Ho AY, Malecki J, Moen A, Enserink JM, et al. (2014) Identification and characterization of a novel evolutionarily conserved lysine-specific methyltransferase targeting eukaryotic translation elongation factor 2 (eEF2). *J Biol Chem* 289: 30499-30510.
38. Bottermann K, Reinartz M, Barsoum M, Kotter S, Godecke A (2013) Systematic Analysis Reveals Elongation Factor 2 and alpha-Enolase as Novel Interaction Partners of AKT2. *PLoS One* 8: e66045.
39. Sheikh MS, Fernandez-Salas E, Yu M, Hussain A, Dinman JD, et al. (1999) Cloning and characterization of a human genotoxic and endoplasmic reticulum stress-inducible cDNA that encodes translation initiation factor 1(eIF1(A121/SUI1)). *J Biol Chem* 274: 16487-16493.
40. Querol-Audi J, Sun C, Vogan JM, Smith MD, Gu Y, et al. (2013) Architecture of human translation initiation factor 3. *Structure* 21: 920-928.
41. Zhou M, Sandercock AM, Fraser CS, Ridlova G, Stephens E, et al. (2008) Mass spectrometry reveals modularity and a complete subunit interaction map of the eukaryotic translation factor eIF3. *Proc Natl Acad Sci U S A* 105: 18139-18144.
42. So J, Pasculescu A, Dai AY, Williton K, James A, et al. (2015) Integrative analysis of kinase networks in TRAIL-induced apoptosis provides a source of potential targets for combination therapy. *Sci Signal* 8: rs3.
43. Yanagiya A, Suyama E, Adachi H, Svitkin YV, Aza-Blanc P, et al. (2012) Translational homeostasis via the mRNA cap-binding protein, eIF4E. *Mol Cell* 46: 847-858.
44. Bradrick SS, Gromeier M (2009) Identification of gemin5 as a novel 7-methylguanosine cap-binding protein. *PLoS One* 4: e7030.



45. Rychlik W, Domier LL, Gardner PR, Hellmann GM, Rhoads RE (1987) Amino acid sequence of the mRNA cap-binding protein from human tissues. *Proc Natl Acad Sci U S A* 84: 945-949.
46. Gosselin P, Martineau Y, Morales J, Czjzek M, Glippa V, et al. (2013) Tracking a refined eIF4E-binding motif reveals Angel1 as a new partner of eIF4E. *Nucleic Acids Res* 41: 7783-7792.
47. Yu C, Ji SY, Sha QQ, Dang Y, Zhou JJ, et al. (2016) BTG4 is a meiotic cell cycle-coupled maternal-zygotic-transition licensing factor in oocytes. *Nat Struct Mol Biol* 23: 387-394.
48. Janzen DM, Geballe AP (2004) The effect of eukaryotic release factor depletion on translation termination in human cell lines. *Nucleic Acids Res* 32: 4491-4502.
49. Guenet L, Toutain B, Guilleret I, Chauvel B, Deaven LL, et al. (1999) Human release factor eRF1: structural organisation of the unique functional gene on chromosome 5 and of the three processed pseudogenes. *FEBS Lett* 454: 131-136.
50. Inge-Vechtomov S, Zhouravleva G, Philippe M (2003) Eukaryotic release factors (eRFs) history. *Biol Cell* 95: 195-209.
51. Chavatte L, Frolova L, Laugaa P, Kisselev L, Favre A (2003) Stop codons and UGG promote efficient binding of the polypeptide release factor eRF1 to the ribosomal A site. *J Mol Biol* 331: 745-758.
52. George CH, Sorathia R, Bertrand BM, Lai FA (2003) In situ modulation of the human cardiac ryanodine receptor (hRyR2) by FKBP12.6. *Biochem J* 370: 579-589.
53. Schiene-Fischer C, Yu C (2001) Receptor accessory folding helper enzymes: the functional role of peptidyl prolyl cis/trans isomerases. *FEBS Lett* 495: 1-6.
54. Matsuda A, Suzuki Y, Honda G, Muramatsu S, Matsuzaki O, et al. (2003) Large-scale identification and characterization of human genes that activate NF-kappaB and MAPK signaling pathways. *Oncogene* 22: 3307-3318.
55. Bauriedel G, Jabs A, Kraemer S, Nickenig G, Skowasch D (2008) Neointimal expression of rapamycin receptor FK506-binding protein FKBP12: postinjury animal and human in-stent restenosis tissue characteristics. *J Vasc Res* 45: 173-178.
56. Yamaguchi T, Kurisaki A, Yamakawa N, Minakuchi K, Sugino H (2006) FKBP12 functions as an adaptor of the Smad7-Smurfl complex on activin type I receptor. *J Mol Endocrinol* 36: 569-579.
57. Liu FL, Liu TY, Kung FL (2014) FKBP12 regulates the localization and processing of amyloid precursor protein in human cell lines. *J Biosci* 39: 85-95.
58. Petschnigg J, Groisman B, Kotlyar M, Taipale M, Zheng Y, et al. (2014) The mammalian-membrane two-hybrid assay (MaMTH) for probing membrane-protein interactions in human cells. *Nat Methods* 11: 585-592.
59. Wang T, Donahoe PK, Zervos AS (1994) Specific interaction of type I receptors of the TGF-beta family with the immunophilin FKBP-12. *Science* 265: 674-676.
60. Sedlacek Z, Konecki DS, Korn B, Klauck SM, Poustka A (1994) Evolutionary conservation and genomic organization of XAP-4, an Xq28 located gene coding for a human rab GDP-dissociation inhibitor (GDI). *Mamm Genome* 5: 633-639.

61. Sahni N, Yi S, Taipale M, Fuxman Bass JI, Coulombe-Huntington J, et al. (2015) Widespread macromolecular interaction perturbations in human genetic disorders. *Cell* 161: 647-660.
62. Zhang B, Zhang T, Wang G, Wang G, Chi W, et al. (2015) GSK3 $\beta$ -Dzip1-Rab8 cascade regulates ciliogenesis after mitosis. *PLoS Biol* 13: e1002129.
63. Watazu Y, Uji Y, Sugiuchi H, Okabe H, Murao S (1990) New automated measurement of mitochondrial aspartate aminotransferase with use of protease 401. *Clin Chem* 36: 687-689.
64. Doyle JM, Schinina ME, Bossa F, Doonan S (1990) The amino acid sequence of cytosolic aspartate aminotransferase from human liver. *Biochem J* 270: 651-657.
65. Moslemi AR, Lindberg C, Nilsson J, Tajsharghi H, Andersson B, et al. (2010) Glycogenin-1 deficiency and inactivated priming of glycogen synthesis. *N Engl J Med* 362: 1203-1210.
66. Keough DT, Hockova D, Holy A, Naesens LM, Skinner-Adams TS, et al. (2009) Inhibition of hypoxanthine-guanine phosphoribosyltransferase by acyclic nucleoside phosphonates: a new class of antimalarial therapeutics. *J Med Chem* 52: 4391-4399.
67. Eads JC, Scapin G, Xu Y, Grubmeyer C, Sacchettini JC (1994) The crystal structure of human hypoxanthine-guanine phosphoribosyltransferase with bound GMP. *Cell* 78: 325-334.
68. Shi W, Li CM, Tyler PC, Furneaux RH, Grubmeyer C, et al. (1999) The 2.0 Å structure of human hypoxanthine-guanine phosphoribosyltransferase in complex with a transition-state analog inhibitor. *Nat Struct Biol* 6: 588-593.
69. Fathallah DM, Cherif D, Dellagi K, Arnaout MA (1993) Molecular cloning of a novel human hsp70 from a B cell line and its assignment to chromosome 5. *J Immunol* 151: 810-813.
70. Tholander F, Muroya A, Roques BP, Fournie-Zaluski MC, Thunnissen MM, et al. (2008) Structure-based dissection of the active site chemistry of leukotriene A4 hydrolase: implications for M1 aminopeptidases and inhibitor design. *Chem Biol* 15: 920-929.
71. Rudberg PC, Tholander F, Andberg M, Thunnissen MM, Haeggstrom JZ (2004) Leukotriene A4 hydrolase: identification of a common carboxylate recognition site for the epoxide hydrolase and aminopeptidase substrates. *J Biol Chem* 279: 27376-27382.
72. Rudberg PC, Tholander F, Thunnissen MM, Haeggstrom JZ (2002) Leukotriene A4 hydrolase/aminopeptidase. Glutamate 271 is a catalytic residue with specific roles in two distinct enzyme mechanisms. *J Biol Chem* 277: 1398-1404.
73. Medina JF, Wetterholm A, Radmark O, Shapiro R, Haeggstrom JZ, et al. (1991) Leukotriene A4 hydrolase: determination of the three zinc-binding ligands by site-directed mutagenesis and zinc analysis. *Proc Natl Acad Sci U S A* 88: 7620-7624.
74. Lee OH, Kim H, He Q, Baek HJ, Yang D, et al. (2011) Genome-wide YFP fluorescence complementation screen identifies new regulators for telomere signaling in human cells. *Mol Cell Proteomics* 10: M110 001628.
75. Tanaka T, Inazawa J, Nakamura Y (1996) Molecular cloning and mapping of a human cDNA for cytosolic malate dehydrogenase (MDH1). *Genomics* 32: 128-130.

76. Barreiro O, Yanez-Mo M, Serrador JM, Montoya MC, Vicente-Manzanares M, et al. (2002) Dynamic interaction of VCAM-1 and ICAM-1 with moesin and ezrin in a novel endothelial docking structure for adherent leukocytes. *J Cell Biol* 157: 1233-1245.
77. Jin H, Song YP, Boel G, Kochar J, Pancholi V (2005) Group A streptococcal surface GAPDH, SDH, recognizes uPAR/CD87 as its receptor on the human pharyngeal cell and mediates bacterial adherence to host cells. *J Mol Biol* 350: 27-41.
78. Steger M, Tonelli F, Ito G, Davies P, Trost M, et al. (2016) Phosphoproteomics reveals that Parkinson's disease kinase LRRK2 regulates a subset of Rab GTPases. *Elife* 5.
79. Guaitoli G, Raimondi F, Gilsbach BK, Gomez-Llorente Y, Deyaert E, et al. (2016) Structural model of the dimeric Parkinson's protein LRRK2 reveals a compact architecture involving distant interdomain contacts. *Proc Natl Acad Sci U S A* 113: E4357-4366.
80. Belkina NV, Liu Y, Hao JJ, Karasuyama H, Shaw S (2009) LOK is a major ERM kinase in resting lymphocytes and regulates cytoskeletal rearrangement through ERM phosphorylation. *Proc Natl Acad Sci U S A* 106: 4707-4712.
81. Zhang M, Bohlson SS, Dy M, Tenner AJ (2005) Modulated interaction of the ERM protein, moesin, with CD93. *Immunology* 115: 63-73.
82. Lankes WT, Furthmayr H (1991) Moesin: a member of the protein 4.1-talin-ezrin family of proteins. *Proc Natl Acad Sci U S A* 88: 8297-8301.
83. Della Ragione F, Takabayashi K, Mastropietro S, Mercurio C, Oliva A, et al. (1996) Purification and characterization of recombinant human 5'-methylthioadenosine phosphorylase: definite identification of coding cDNA. *Biochem Biophys Res Commun* 223: 514-519.
84. Beresford PJ, Zhang D, Oh DY, Fan Z, Greer EL, et al. (2001) Granzyme A activates an endoplasmic reticulum-associated caspase-independent nuclease to induce single-stranded DNA nicks. *J Biol Chem* 276: 43285-43293.
85. Chen Y, Gallois-Montbrun S, Schneider B, Veron M, Morera S, et al. (2003) Nucleotide binding to nucleoside diphosphate kinases: X-ray structure of human NDPK-A in complex with ADP and comparison to protein kinases. *J Mol Biol* 332: 915-926.
86. Kim SH, Kim J (2006) Reduction of invasion in human fibrosarcoma cells by ribosomal protein S3 in conjunction with Nm23-H1 and ERK. *Biochim Biophys Acta* 1763: 823-832.
87. Postel EH, Berberich SJ, Flint SJ, Ferrone CA (1993) Human c-myc transcription factor PuF identified as nm23-H2 nucleoside diphosphate kinase, a candidate suppressor of tumor metastasis. *Science* 261: 478-480.
88. Boissan M, Montagnac G, Shen Q, Griparic L, Guitton J, et al. (2014) Membrane trafficking. Nucleoside diphosphate kinases fuel dynamin superfamily proteins with GTP for membrane remodeling. *Science* 344: 1510-1515.
89. Stoltze L, Schirle M, Schwarz G, Schroter C, Thompson MW, et al. (2000) Two new proteases in the MHC class I processing pathway. *Nat Immunol* 1: 413-418.
90. Steggerda SM, Black BE, Paschal BM (2000) Monoclonal antibodies to NTF2 inhibit nuclear protein import by preventing nuclear translocation of the GTPase Ran. *Mol Biol Cell* 11: 703-719.

91. Van Impe K, Hubert T, De Corte V, Vanloo B, Boucherie C, et al. (2008) A new role for nuclear transport factor 2 and Ran: nuclear import of CapG. *Traffic* 9: 695-707.
92. Lu M, Zak J, Chen S, Sanchez-Pulido L, Severson DT, et al. (2014) A code for RanGDP binding in ankyrin repeats defines a nuclear import pathway. *Cell* 157: 1130-1145.
93. Rual JF, Venkatesan K, Hao T, Hirozane-Kishikawa T, Dricot A, et al. (2005) Towards a proteome-scale map of the human protein-protein interaction network. *Nature* 437: 1173-1178.
94. Xiao J, Liu C, Li G, Peng S, Hu J, et al. (2013) PDCD5 negatively regulates autoimmunity by upregulating FOXP3(+) regulatory T cells and suppressing Th17 and Th1 responses. *J Autoimmun* 47: 34-44.
95. Tracy CM, Gray AJ, Cuellar J, Shaw TS, Howlett AC, et al. (2014) Programmed cell death protein 5 interacts with the cytosolic chaperonin containing tailless complex polypeptide 1 (CCT) to regulate beta-tubulin folding. *J Biol Chem* 289: 4490-4502.
96. Ling X, Liu Y, Fan H, Zhong Y, Li D, et al. (2007) Studies on interactions of programmed cell death 5 (PDCD5) and its related peptides with heparin by capillary zone electrophoresis. *Anal Bioanal Chem* 387: 909-916.
97. Zhao J, O'Donnell VB, Balzar S, St Croix CM, Trudeau JB, et al. (2011) 15-Lipoxygenase 1 interacts with phosphatidylethanolamine-binding protein to regulate MAPK signaling in human airway epithelial cells. *Proc Natl Acad Sci U S A* 108: 14246-14251.
98. Taipale M, Tucker G, Peng J, Krykbaeva I, Lin ZY, et al. (2014) A quantitative chaperone interaction network reveals the architecture of cellular protein homeostasis pathways. *Cell* 158: 434-448.
99. Tsao ML, Chao CH, Yeh CT (2006) Interaction of hepatitis C virus F protein with prefoldin 2 perturbs tubulin cytoskeleton organization. *Biochem Biophys Res Commun* 348: 271-277.
100. Vainberg IE, Lewis SA, Rommelaere H, Ampe C, Vandekerckhove J, et al. (1998) Prefoldin, a chaperone that delivers unfolded proteins to cytosolic chaperonin. *Cell* 93: 863-873.
101. Rippa M, Giovannini PP, Barrett MP, Dallochio F, Hanau S (1998) 6-Phosphogluconate dehydrogenase: the mechanism of action investigated by a comparison of the enzyme from different species. *Biochim Biophys Acta* 1429: 83-92.
102. Lee Y, Stiers KM, Kain BN, Beamer LJ (2014) Compromised catalysis and potential folding defects in in vitro studies of missense mutants associated with hereditary phosphoglucomutase 1 deficiency. *J Biol Chem* 289: 32010-32019.
103. Stiers KM, Kain BN, Graham AC, Beamer LJ (2016) Induced Structural Disorder as a Molecular Mechanism for Enzyme Dysfunction in Phosphoglucomutase 1 Deficiency. *J Mol Biol* 428: 1493-1505.
104. Fujii H, Krietsch WK, Yoshida A (1980) A single amino acid substitution (Asp leads to Asn) in a phosphoglycerate kinase variant (PGK Munchen) associated with enzyme deficiency. *J Biol Chem* 255: 6421-6423.

105. Lay AJ, Jiang XM, Kisker O, Flynn E, Underwood A, et al. (2000) Phosphoglycerate kinase acts in tumour angiogenesis as a disulphide reductase. *Nature* 408: 869-873.
106. Wang S, Jiang B, Zhang T, Liu L, Wang Y, et al. (2015) Insulin and mTOR Pathway Regulate HDAC3-Mediated Deacetylation and Activation of PGK1. *PLoS Biol* 13: e1002243.
107. Garner K, Hunt AN, Koster G, Somerharju P, Groves E, et al. (2012) Phosphatidylinositol transfer protein, cytoplasmic 1 (PITPNC1) binds and transfers phosphatidic acid. *J Biol Chem* 287: 32263-32276.
108. Vander Heiden MG, Christofk HR, Schuman E, Subtelny AO, Sharfi H, et al. (2010) Identification of small molecule inhibitors of pyruvate kinase M2. *Biochem Pharmacol* 79: 1118-1124.
109. Buschow SI, van Balkom BW, Aalberts M, Heck AJ, Wauben M, et al. (2010) MHC class II-associated proteins in B-cell exosomes and potential functional implications for exosome biogenesis. *Immunol Cell Biol* 88: 851-856.
110. Chen TC, Lin KT, Chen CH, Lee SA, Lee PY, et al. (2014) Using an in situ proximity ligation assay to systematically profile endogenous protein-protein interactions in a pathway network. *J Proteome Res* 13: 5339-5346.
111. Sanchez-Font MF, Sebastia J, Sanfeliu C, Cristofol R, Marfany G, et al. (2003) Peroxiredoxin 2 (PRDX2), an antioxidant enzyme, is under-expressed in Down syndrome fetal brains. *Cell Mol Life Sci* 60: 1513-1523.
112. Parmigiani RB, Xu WS, Venta-Perez G, Erdjument-Bromage H, Yaneva M, et al. (2008) HDAC6 is a specific deacetylase of peroxiredoxins and is involved in redox regulation. *Proc Natl Acad Sci U S A* 105: 9633-9638.
113. Sobotta MC, Liou W, Stocker S, Talwar D, Oehler M, et al. (2015) Peroxiredoxin-2 and STAT3 form a redox relay for H<sub>2</sub>O<sub>2</sub> signaling. *Nat Chem Biol* 11: 64-70.
114. Bey F, Silva Pereira I, Coux O, Viegas-Pequignot E, Recillas Targa F, et al. (1993) The prosomal RNA-binding protein p27K is a member of the alpha-type human prosomal gene family. *Mol Gen Genet* 237: 193-205.
115. Bouwmeester T, Bauch A, Ruffner H, Angrand PO, Bergamini G, et al. (2004) A physical and functional map of the human TNF-alpha/NF-kappa B signal transduction pathway. *Nat Cell Biol* 6: 97-105.
116. Nishimura T, Horino K, Nishiura H, Shibuya Y, Hiraoka T, et al. (2001) Apoptotic cells of an epithelial cell line, AsPC-1, release monocyte chemotactic S19 ribosomal protein dimer. *J Biochem* 129: 445-454.
117. Soulet F, Al Saati T, Roga S, Amalric F, Bouche G (2001) Fibroblast growth factor-2 interacts with free ribosomal protein S19. *Biochem Biophys Res Commun* 289: 591-596.
118. Jefferson M, Donaszi-Ivanov A, Pollen S, Dalmay T, Saalbach G, et al. (2014) Host factors that interact with the pestivirus N-terminal protease, Npro, are components of the ribonucleoprotein complex. *J Virol* 88: 10340-10353.
119. Chiocchetti A, Gibello L, Carando A, Aspesi A, Secco P, et al. (2005) Interactions between RPS19, mutated in Diamond-Blackfan anemia, and the PIM-1 oncoprotein. *Haematologica* 90: 1453-1462.

120. Yu Y, Ji H, Doudna JA, Leary JA (2005) Mass spectrometric analysis of the human 40S ribosomal subunit: native and HCV IRES-bound complexes. *Protein Sci* 14: 1438-1446.
121. Sato M, Saeki Y, Tanaka K, Kaneda Y (1999) Ribosome-associated protein LBP/p40 binds to S21 protein of 40S ribosome: analysis using a yeast two-hybrid system. *Biochem Biophys Res Commun* 256: 385-390.
122. Wang C, Guo Y, Tian Q, Jia Q, Gao Y, et al. (2015) SerRS-tRNA<sup>Sec</sup> complex structures reveal mechanism of the first step in selenocysteine biosynthesis. *Nucleic Acids Res* 43: 10534-10545.
123. Xu X, Shi Y, Yang XL (2013) Crystal structure of human Seryl-tRNA synthetase and Ser-SA complex reveals a molecular lever specific to higher eukaryotes. *Structure* 21: 2078-2086.
124. Vincent C, Tarbouriech N, Hartlein M (1997) Genomic organization, cDNA sequence, bacterial expression, and purification of human seryl-tRNA synthase. *Eur J Biochem* 250: 77-84.
125. Shi Y, Xu X, Zhang Q, Fu G, Mo Z, et al. (2014) tRNA synthetase counteracts c-Myc to develop functional vasculature. *Elife* 3: e02349.
126. Lu H, Galeano MCR, Ott E, Kaeslin G, Kausalya PJ, et al. (2017) Mutations in DZIP1L, which encodes a ciliary-transition-zone protein, cause autosomal recessive polycystic kidney disease. *Nat Genet* 49: 1025-1034.
127. Soler-Lopez M, Zanzoni A, Lluís R, Stelzl U, Aloy P (2011) Interactome mapping suggests new mechanistic details underlying Alzheimer's disease. *Genome Res* 21: 364-376.
128. Prapapanich V, Chen S, Nair SC, Rimerman RA, Smith DF (1996) Molecular cloning of human p48, a transient component of progesterone receptor complexes and an Hsp70-binding protein. *Mol Endocrinol* 10: 420-431.
129. Yadav L, Tamene F, Goos H, van Drogen A, Katainen R, et al. (2017) Systematic Analysis of Human Protein Phosphatase Interactions and Dynamics. *Cell Syst* 4: 430-444 e435.
130. Kumar R, Haugen JD (1994) Human and rat osteoblast-like cells express stathmin, a growth-regulatory protein. *Biochem Biophys Res Commun* 201: 861-865.
131. Honnappa S, Cutting B, Jahnke W, Seelig J, Steinmetz MO (2003) Thermodynamics of the Op18/stathmin-tubulin interaction. *J Biol Chem* 278: 38926-38934.
132. Yachie N, Petsalaki E, Mellor JC, Weile J, Jacob Y, et al. (2016) Pooled-matrix protein interaction screens using Barcode Fusion Genetics. *Mol Syst Biol* 12: 863.
133. Kanadome T, Shibata H, Kuwata K, Takahara T, Maki M (2017) The calcium-binding protein ALG-2 promotes endoplasmic reticulum exit site localization and polymerization of Trk-fused gene (TFG) protein. *FEBS J* 284: 56-76.
134. Cassimeris L, Safer D, Nachmias VT, Zigmond SH (1992) Thymosin beta 4 sequesters the majority of G-actin in resting human polymorphonuclear leukocytes. *J Cell Biol* 119: 1261-1270.
135. Freeman KW, Bowman BR, Zetter BR (2011) Regenerative protein thymosin beta-4 is a novel regulator of purinergic signaling. *FASEB J* 25: 907-915.
136. Brieger A, Adryan B, Wolpert F, Passmann S, Zeuzem S, et al. (2010) Cytoskeletal scaffolding proteins interact with Lynch-Syndrome associated mismatch repair protein MLH1. *Proteomics* 10: 3343-3355.

137. Geier E, Pfeifer G, Wilm M, Lucchiari-Hartz M, Baumeister W, et al. (1999) A giant protease with potential to substitute for some functions of the proteasome. *Science* 283: 978-981.
138. Schonegge AM, Villa E, Forster F, Hegerl R, Peters J, et al. (2012) The structure of human tripeptidyl peptidase II as determined by a hybrid approach. *Structure* 20: 593-603.
139. Deutscher SL, Harley JB, Keene JD (1988) Molecular analysis of the 60-kDa human Ro ribonucleoprotein. *Proc Natl Acad Sci U S A* 85: 9479-9483.
140. Verma S, Ismail A, Gao X, Fu G, Li X, et al. (2004) The ubiquitin-conjugating enzyme UBCH7 acts as a coactivator for steroid hormone receptors. *Mol Cell Biol* 24: 8716-8726.
141. David Y, Ziv T, Admon A, Navon A (2010) The E2 ubiquitin-conjugating enzymes direct polyubiquitination to preferred lysines. *J Biol Chem* 285: 8595-8604.
142. Staropoli JF, McDermott C, Martinat C, Schulman B, Demireva E, et al. (2003) Parkin is a component of an SCF-like ubiquitin ligase complex and protects postmitotic neurons from kainate excitotoxicity. *Neuron* 37: 735-749.
143. Wenzel DM, Lissounov A, Brzovic PS, Klevit RE (2011) UBCH7 reactivity profile reveals parkin and HHARI to be RING/HECT hybrids. *Nature* 474: 105-108.
144. Robinson PA, Leek JP, Thompson J, Carr IM, Bailey A, et al. (1995) A human ubiquitin conjugating enzyme, L-UBC, maps in the Alzheimer's disease locus on chromosome 14q24.3. *Mamm Genome* 6: 725-731.
145. Scott DC, Rhee DY, Duda DM, Kelsall IR, Olszewski JL, et al. (2016) Two Distinct Types of E3 Ligases Work in Unison to Regulate Substrate Ubiquitylation. *Cell* 166: 1198-1214 e1124.
146. Peng HL, Chang HY (1993) Cloning of a human liver UDP-glucose pyrophosphorylase cDNA by complementation of the bacterial galU mutation. *FEBS Lett* 329: 153-158.
147. Cerecedo D, Mondragon R, Cisneros B, Martinez-Perez F, Martinez-Rojas D, et al. (2006) Role of dystrophins and utrophins in platelet adhesion process. *Br J Haematol* 134: 83-91.
148. Johnson RP, Craig SW (1995) F-actin binding site masked by the intramolecular association of vinculin head and tail domains. *Nature* 373: 261-264.
149. Watabe-Uchida M, Uchida N, Imamura Y, Nagafuchi A, Fujimoto K, et al. (1998) alpha-Catenin-vinculin interaction functions to organize the apical junctional complex in epithelial cells. *J Cell Biol* 142: 847-857.
150. Peng X, Cuff LE, Lawton CD, DeMali KA (2010) Vinculin regulates cell-surface E-cadherin expression by binding to beta-catenin. *J Cell Sci* 123: 567-577.
151. Cerecedo D, Cisneros B, Suarez-Sanchez R, Hernandez-Gonzalez E, Galvan I (2008) beta-Dystroglycan modulates the interplay between actin and microtubules in human-adhered platelets. *Br J Haematol* 141: 517-528.
152. Davison EJ, Pennington K, Hung CC, Peng J, Rafiq R, et al. (2009) Proteomic analysis of increased Parkin expression and its interactants provides evidence for a role in modulation of mitochondrial function. *Proteomics* 9: 4284-4297.
153. Jerath NU, Crockett CD, Moore SA, Shy ME, Weihl CC, et al. (2015) Rare Manifestation of a c.290 C>T, p.Gly97Glu VCP Mutation. *Case Rep Genet* 2015: 239167.

154. Laco MN, Cortes L, Travis SM, Paulson HL, Rego AC (2012) Valosin-containing protein (VCP/p97) is an activator of wild-type ataxin-3. *PLoS One* 7: e43563.
155. Wang Q, Liu Y, Soetandyo N, Baek K, Hegde R, et al. (2011) A ubiquitin ligase-associated chaperone holdase maintains polypeptides in soluble states for proteasome degradation. *Mol Cell* 42: 758-770.
156. Hanzelmann P, Schindelin H (2016) Structural Basis of ATP Hydrolysis and Intersubunit Signaling in the AAA+ ATPase p97. *Structure* 24: 127-139.
157. Banerjee S, Bartesaghi A, Merk A, Rao P, Bulfer SL, et al. (2016) 2.3 Å resolution cryo-EM structure of human p97 and mechanism of allosteric inhibition. *Science* 351: 871-875.
158. Schuller JM, Beck F, Lossel P, Heck AJ, Forster F (2016) Nucleotide-dependent conformational changes of the AAA+ ATPase p97 revisited. *FEBS Lett* 590: 595-604.
159. Dai RM, Li CC (2001) Valosin-containing protein is a multi-ubiquitin chain-targeting factor required in ubiquitin-proteasome degradation. *Nat Cell Biol* 3: 740-744.
160. Papadopoulos C, Kirchner P, Bug M, Grum D, Koerver L, et al. (2017) VCP/p97 cooperates with YOD1, UBXD1 and PLAA to drive clearance of ruptured lysosomes by autophagy. *EMBO J* 36: 135-150.
161. McNeill H, Knebel A, Arthur JS, Cuenda A, Cohen P (2004) A novel UBA and UBX domain protein that binds polyubiquitin and VCP and is a substrate for SAPKs. *Biochem J* 384: 391-400.
162. Zhang SH, Liu J, Kobayashi R, Tonks NK (1999) Identification of the cell cycle regulator VCP (p97/CDC48) as a substrate of the band 4.1-related protein-tyrosine phosphatase PTPH1. *J Biol Chem* 274: 17806-17812.
163. Blount JR, Burr AA, Denuc A, Marfany G, Todi SV (2012) Ubiquitin-specific protease 25 functions in Endoplasmic Reticulum-associated degradation. *PLoS One* 7: e36542.
164. Ye Y, Shibata Y, Kikkert M, van Voorden S, Wiertz E, et al. (2005) Recruitment of the p97 ATPase and ubiquitin ligases to the site of retrotranslocation at the endoplasmic reticulum membrane. *Proc Natl Acad Sci U S A* 102: 14132-14138.
165. Wakasugi K, Schimmel P (1999) Two distinct cytokines released from a human aminoacyl-tRNA synthetase. *Science* 284: 147-151.
166. Sajish M, Schimmel P (2015) A human tRNA synthetase is a potent PARP1-activating effector target for resveratrol. *Nature* 519: 370-373.
167. Park HJ, Hong YB, Choi YC, Lee J, Kim EJ, et al. (2016) ADSSL1 mutation relevant to autosomal recessive adolescent onset distal myopathy. *Ann Neurol* 79: 231-243.
168. Sun H, Li N, Wang X, Chen T, Shi L, et al. (2005) Molecular cloning and characterization of a novel muscle adenylosuccinate synthetase, AdSSL1, from human bone marrow stromal cells. *Mol Cell Biochem* 269: 85-94.
169. Takatsu H, Baba K, Shima T, Umino H, Kato U, et al. (2011) ATP9B, a P4-ATPase (a putative aminophospholipid translocase), localizes to the trans-Golgi network in a CDC50 protein-independent manner. *J Biol Chem* 286: 38159-38167.
170. Lykidis A, Jackson PD, Rock CO, Jackowski S (1997) The role of CDP-diacylglycerol synthetase and phosphatidylinositol synthase activity levels in the



- regulation of cellular phosphatidylinositol content. *J Biol Chem* 272: 33402-33409.
171. Yuan WC, Lee YR, Lin SY, Chang LY, Tan YP, et al. (2014) K33-Linked Polyubiquitination of Coronin 7 by Cul3-KLHL20 Ubiquitin E3 Ligase Regulates Protein Trafficking. *Mol Cell* 54: 586-600.
  172. Shimada A, Yamaguchi A, Kohda D (2016) Structural basis for the recognition of two consecutive mutually interacting DPF motifs by the SGIP1 mu homology domain. *Sci Rep* 6: 19565.
  173. Polekhina G, Board PG, Gali RR, Rossjohn J, Parker MW (1999) Molecular basis of glutathione synthetase deficiency and a rare gene permutation event. *EMBO J* 18: 3204-3213.
  174. Raychaudhuri S, Sinha M, Mukhopadhyay D, Bhattacharyya NP (2008) HYPK, a Huntingtin interacting protein, reduces aggregates and apoptosis induced by N-terminal Huntingtin with 40 glutamines in Neuro2a cells and exhibits chaperone-like activity. *Hum Mol Genet* 17: 240-255.
  175. Gu M, LaJoie D, Chen OS, von Appen A, Ladinsky MS, et al. (2017) LEM2 recruits CHMP7 for ESCRT-mediated nuclear envelope closure in fission yeast and human cells. *Proc Natl Acad Sci U S A* 114: E2166-E2175.
  176. Koyama K, Ogura Y, Nakai D, Watanabe M, Munemasa T, et al. (2014) Identification of bioactivating enzymes involved in the hydrolysis of laninamivir octanoate, a long-acting neuraminidase inhibitor, in human pulmonary tissue. *Drug Metab Dispos* 42: 1031-1038.
  177. Wang A, Yang HC, Friedman P, Johnson CA, Dennis EA (1999) A specific human lysophospholipase: cDNA cloning, tissue distribution and kinetic characterization. *Biochim Biophys Acta* 1437: 157-169.
  178. Dekker FJ, Rocks O, Vartak N, Menninger S, Hedberg C, et al. (2010) Small-molecule inhibition of APT1 affects Ras localization and signaling. *Nat Chem Biol* 6: 449-456.
  179. Tang T, Zheng B, Chen SH, Murphy AN, Kudlicka K, et al. (2009) hNOA1 interacts with complex I and DAP3 and regulates mitochondrial respiration and apoptosis. *J Biol Chem* 284: 5414-5424.
  180. Piskacek M, Zotova L, Zsurka G, Schweyen RJ (2009) Conditional knockdown of hMRS2 results in loss of mitochondrial Mg(2+) uptake and cell death. *J Cell Mol Med* 13: 693-700.
  181. Carpenter CL (2004) Btk-dependent regulation of phosphoinositide synthesis. *Biochem Soc Trans* 32: 326-329.
  182. Minczuk M, He J, Duch AM, Ettema TJ, Chlebowska A, et al. (2011) TEFM (c17orf42) is necessary for transcription of human mtDNA. *Nucleic Acids Res* 39: 4284-4299.
  183. Helps NR, Street AJ, Elledge SJ, Cohen PT (1994) Cloning of the complete coding region for human protein phosphatase inhibitor 2 using the two hybrid system and expression of inhibitor 2 in *E. coli*. *FEBS Lett* 340: 93-98.
  184. Li GD, Zhang X, Li R, Wang YD, Wang YL, et al. (2008) CHP2 activates the calcineurin/nuclear factor of activated T cells signaling pathway and enhances the oncogenic potential of HEK293 cells. *J Biol Chem* 283: 32660-32668.

185. Brogan IJ, Pravica V, Hutchinson IV (2000) Genetic conservation of the immunophilin-binding domains of human calcineurin A1 and A2. *Transpl Immunol* 8: 139-141.
186. Muramatsu T, Kincaid RL (1993) Molecular cloning of a full-length cDNA encoding the catalytic subunit of human calmodulin-dependent protein phosphatase (calcineurin A alpha). *Biochim Biophys Acta* 1178: 117-120.
187. Jin L, Harrison SC (2002) Crystal structure of human calcineurin complexed with cyclosporin A and human cyclophilin. *Proc Natl Acad Sci U S A* 99: 13522-13526.
188. Itakura M, Watanabe I, Sugaya T, Takahashi M (2014) Direct association of the unique C-terminal tail of transmembrane AMPA receptor regulatory protein gamma-8 with calcineurin. *FEBS J* 281: 1366-1378.
189. Guerini D, Klee CB (1989) Cloning of human calcineurin A: evidence for two isozymes and identification of a polyproline structural domain. *Proc Natl Acad Sci U S A* 86: 9183-9187.
190. Kissinger CR, Parge HE, Knighton DR, Lewis CT, Pelletier LA, et al. (1995) Crystal structures of human calcineurin and the human FKBP12-FK506-calcineurin complex. *Nature* 378: 641-644.
191. Hisamitsu T, Nakamura TY, Wakabayashi S (2012) Na(+)/H(+) exchanger 1 directly binds to calcineurin A and activates downstream NFAT signaling, leading to cardiomyocyte hypertrophy. *Mol Cell Biol* 32: 3265-3280.
192. Zou X, Qiu G, Chen C, Wu M, Hu Y, et al. (2005) Expression pattern and subcellular localization of five splice isoforms of human PXX. *Int J Mol Med* 16: 701-707.
193. Wang Y, Tai G, Lu L, Johannes L, Hong W, et al. (2005) Trans-Golgi network syntaxin 10 functions distinctly from syntaxins 6 and 16. *Mol Membr Biol* 22: 313-325.
194. Popovic D, Akutsu M, Novak I, Harper JW, Behrends C, et al. (2012) Rab GTPase-activating proteins in autophagy: regulation of endocytic and autophagy pathways by direct binding to human ATG8 modifiers. *Mol Cell Biol* 32: 1733-1744.
195. Lee JH, Tate CM, You JS, Skalnik DG (2007) Identification and characterization of the human Set1B histone H3-Lys4 methyltransferase complex. *J Biol Chem* 282: 13419-13428.
196. Lee JH, You J, Dobrota E, Skalnik DG (2010) Identification and characterization of a novel human PP1 phosphatase complex. *J Biol Chem* 285: 24466-24476.
